# Supplementary material for: Structural and Functional Implications of the Interaction between Macrolide Antibiotics and Bile Acids
Source: PubMed Central journal article supplement (PMC4471570; doi:10.1002/chem.201406413), 2015-02-05
Supplement: chem0021-4350-sd1.pdf [file chem0021-4350-sd1.pdf]

# CHEMISTRY

## A **European** Journal

### Supporting Information

© Copyright Wiley-VCH Verlag GmbH & Co. KGaA, 69451 Weinheim, 2015

#### **Structural and Functional Implications of the Interaction between Macrolide Antibiotics and Bile Acids**

Simon Glanzer,<sup>[a]</sup> Sergio A. Pulido,<sup>[a]</sup> Sarah Tutz,<sup>[b]</sup> Gabriel E. Wagner,<sup>[a]</sup> Manfred Kriechbaum,<sup>[c]</sup> Nina Gubensäk,<sup>[a]</sup> Jovana Trifunovic,<sup>[d]</sup> Markus Dorn,<sup>[e]</sup> Walter M. F. Fabian,<sup>[a]</sup> Predrag Novak,<sup>[f]</sup> Joachim Reidl,<sup>[b]</sup> and Klaus Zangger\*<sup>[a]</sup>

chem\_201406413\_sm\_miscellaneous\_information.pdf

**Supporting Figure 1:**

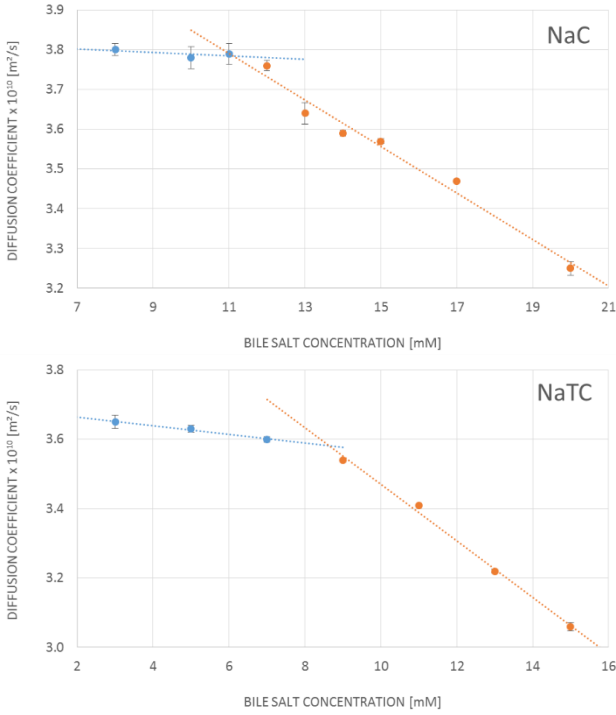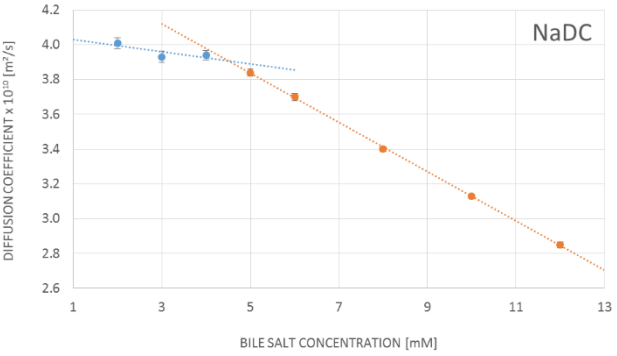

**Supporting Figure 1.** Diffusion values above (red) and below (blue) the cmc in pure D<sub>2</sub>O. The point of intersection represents the cmc of NaC (~ 11 mM), NaDC (~ 4 mM) and NaTC (~ 9 mM).

**Supporting Figure 2:**

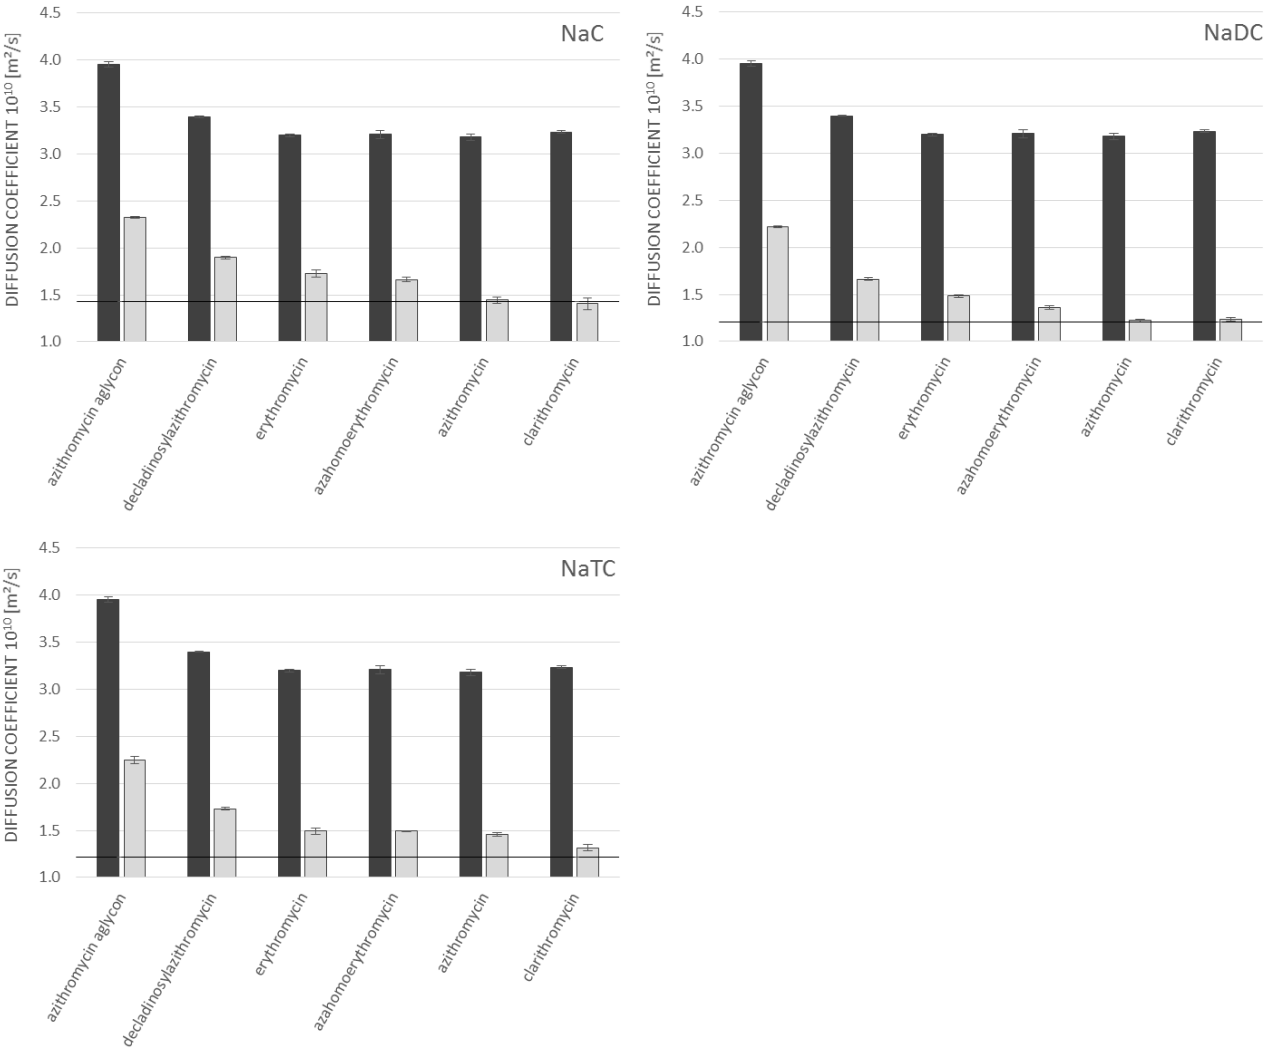

**Supporting Figure 2.** Diffusion coefficients of free antibiotic (black) and in bile salt (grey) in pure  $D_2O$ . The horizontal line represents the micellar diffusion  $D_{mic}$ .

### Supporting Figure 3:

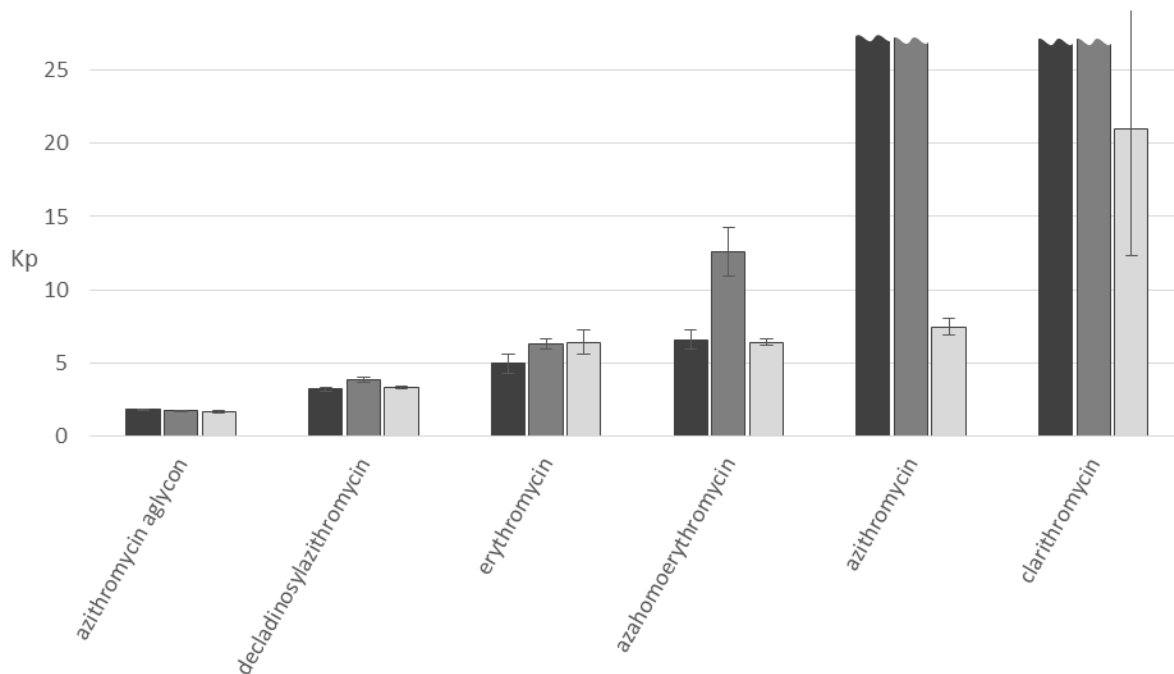

**Supporting Figure 3.** Black: NaC, dark grey: NaDC, light grey: NaTC in pure D<sub>2</sub>O. Mole fraction partition coefficients beyond ~ 40 are ill-defined and indicated by the wave-shaped ends.

Supporting Figure 4:

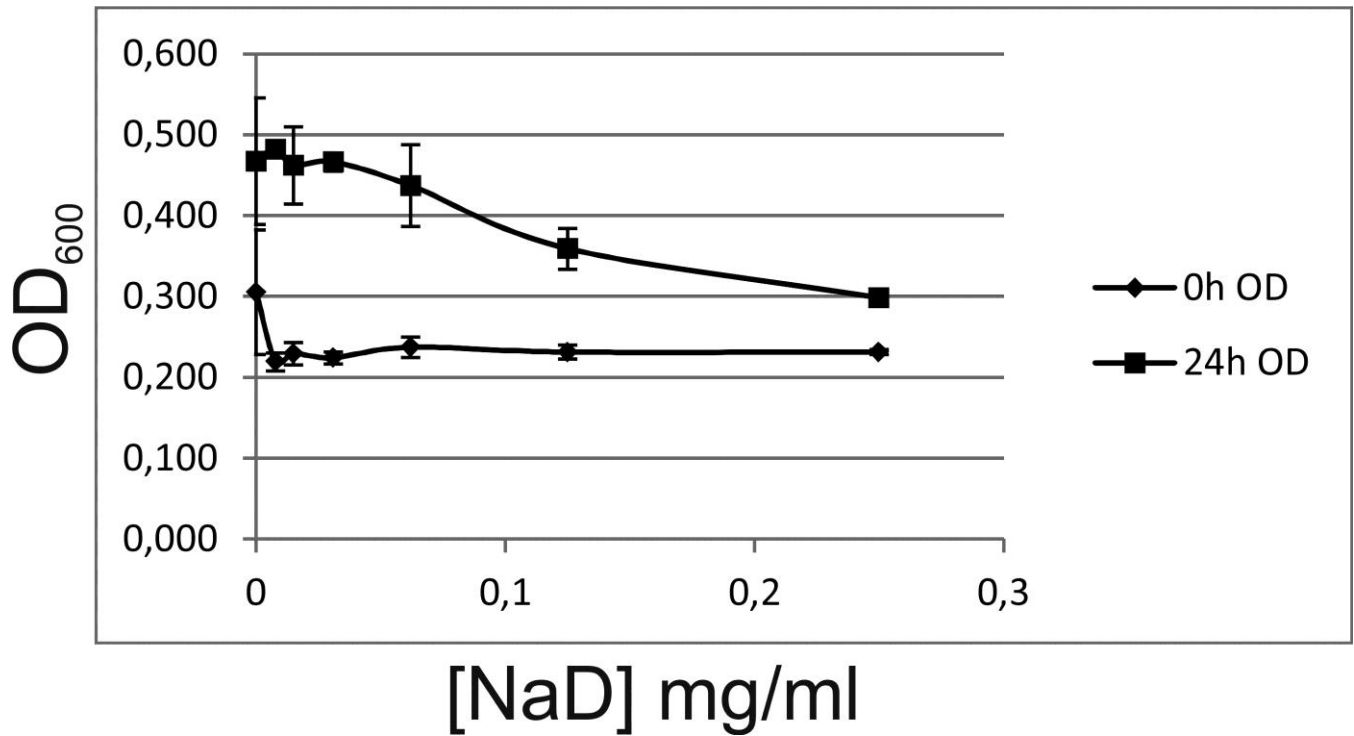

Supporting Figure 4:

Optical density (at 600 nm) of ETEC (enterotoxigenic *E. coli*) cells right after inoculation (0h) and after 24 hours as a function of sodium cholate concentration (in mg NaD per ml).

**Supporting Table 1.** Mole fraction partition coefficients in NaC 100mM, NaDC 50mM and NaTC 50mM in a solvent of pure D<sub>2</sub>O. \*K<sub>p</sub> values above ~40 are unreliable due to huge standard deviations.

|      | azithromycin<br>aglycone | decladinosyl-<br>azithromycin | erythromycin  | azahomo-<br>erythromycin | azithromycin  | clarithromycin |
|------|--------------------------|-------------------------------|---------------|--------------------------|---------------|----------------|
| NaC  | 1.82 +/- 0.04            | 3.22 +/- 0.12                 | 4.94 +/- 0.64 | 6.60 +/- 0.63            | > 42.5 *      | > 60.9*        |
| NaDC | 1.71 +/- 0.03            | 3.83 +/- 0.16                 | 6.29 +/- 0.38 | 11.6 +/- 1.66            | > 68.2 *      | > 41.2 *       |
| NaTC | 1.67 +/- 0.08            | 3.31 +/- 0.12                 | 6.40 +/- 0.85 | 6.39 +/- 0.22            | 7.47 +/- 0.53 | 21.0 +/- 8.72  |

## Experimental

### *NMR Spectroscopy, using pure D<sub>2</sub>O as solvent*

For the interaction studies in D<sub>2</sub>O we used saturated solution of the macrolides. They were obtained by adding an excessive amount of the macrolide and sonicating the sample for 20-30 minutes. To get rid of the remaining solid antibiotic, the sample was centrifuged and the liquid phase was used for further experiments.
